# Supplementary material
Source: Springer Nature journal article supplement (https://www.springermedizin.de/resource/supplementary/12891_2014_2351_MOESM1_ESM.pdf/9510038)
Supplement: MOESM1 [file 9510038]

**Basic Analgesics**

Paracetamol

Ibuprofen (200-400mg)

Aspirin (600mg)

Capsaicin

Topical NSAIDs

**Weak-Moderate Analgesics****Weak combination opioids**

Codeine (8mg) + Paracetamol

Dihydrocodeine (10mg) +

Paracetamol

Tramadol (37.5mg) + Paracetamol

**Moderate combination opioids +  
opioids**

+/- Paracetamol

Codeine (15mg)

Dihydrocodeine (20mg)

Buprenorphine (5-10mcg/hr +

200mcg)

Co-proxamol

Codeine (20mg) + Ibuprofen

(300mg)

Nefopam

**Strong analgesics****Strong combination  
opioids + opioids**

+/- Paracetamol

Codeine (30mg)

Dihydrocodeine (30mg)

Buprenorphine

(>20 mcg/hr + 400mcg)

Tramadol (50mg)

Pentazocine

Pethidine

Meptazinol

**Very strong single  
opioids**

Morphine

Oxycodone

**NSAIDs Including Ibuprofen (600mg)**

**NSAIDs including Ibuprofen (600mg)**

**+ COX 2**
